# Supplementary material for: Underestimated Future Arctic Ocean Warming due to Unresolved Marine Heatwaves at Low Resolution
Source: Copernicus journal article supplement (doi:10.5194/egusphere-2025-5296), 2025-12-21
Supplement: Supplementary file 1 [file egusphere-2025-5296-supplement.pdf]

## Supporting Information for

### **Underestimated Future Arctic Ocean Warming due to Unresolved Marine Heatwaves at Low Resolution**

Ruijian Gou<sup>1,2</sup>, Yaocheng Deng<sup>3</sup>, Yingzhe Cui<sup>3</sup>, Qi Shu<sup>4</sup>, Hong Wang<sup>1</sup>, Shengpeng Wang<sup>1</sup>, Lixin Wu<sup>1,3</sup>, Gerrit Lohmann<sup>2,5</sup>

<sup>1</sup>Laoshan National Laboratory, Qingdao, China.

<sup>2</sup>Alfred Wegener Institute, Bremerhaven, Germany.

<sup>3</sup>Frontiers Science Center for Deep Ocean Multispheres and Earth System and Key Laboratory of Physical Oceanography, Ocean University of China, Qingdao, China

<sup>4</sup>First Institute of Oceanography, MNR, Qingdao, China.

<sup>5</sup>University of Bremen, Bremen, Germany.

### **Contents**

Figures S1 to S8

Table S1

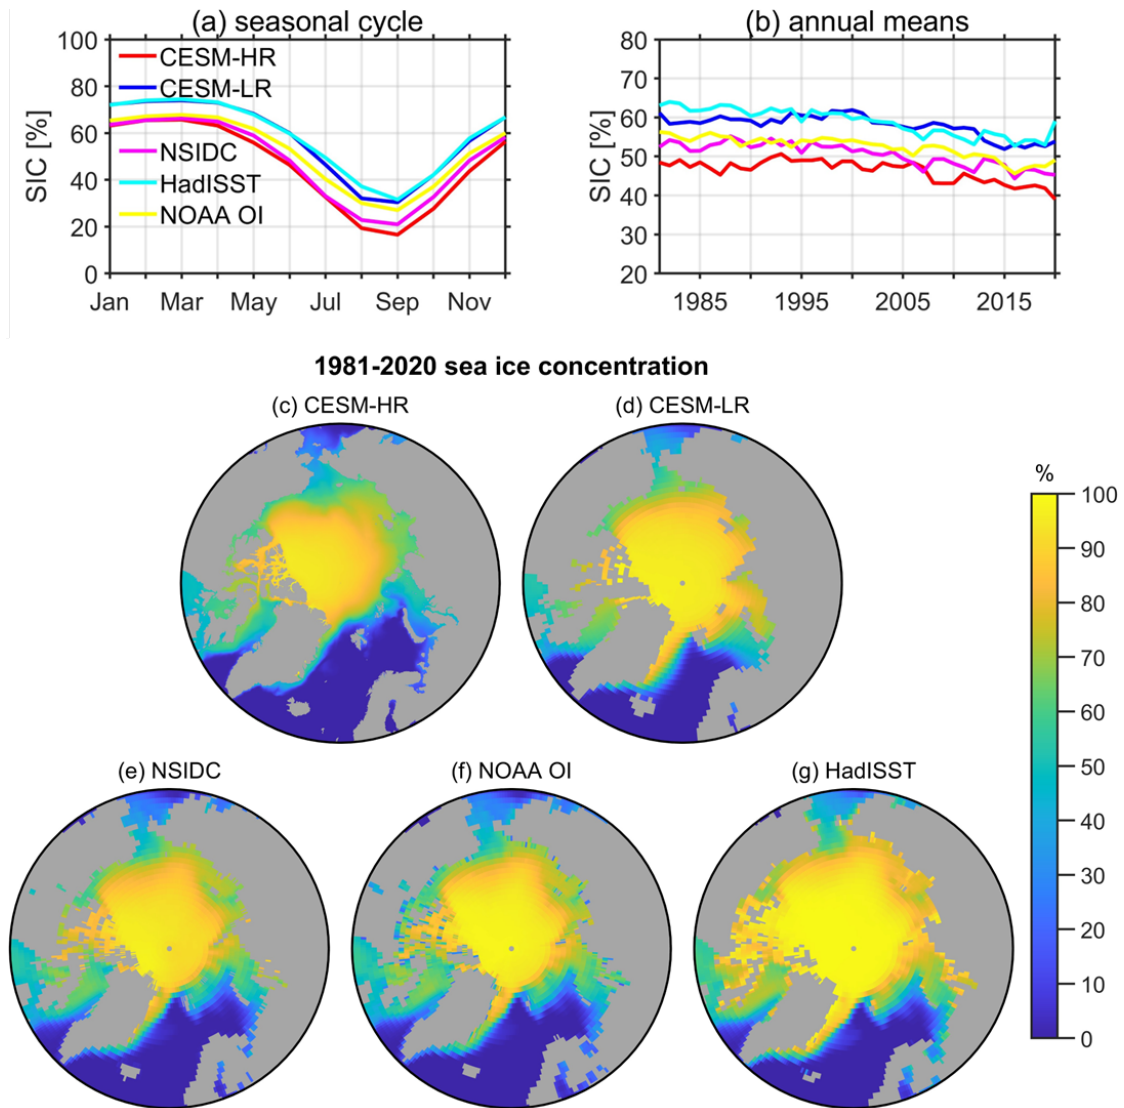

**Fig. S1. Sea ice concentration in CESM-HR and CESM-LR and the comparison to observations.** a-b, seasonal cycles (a) and annual means (b) of Arctic-mean (60-90°N) SIC in CESM-HR, CESM-LR and the observational datasets. d-h, the spatial distributions of time-mean SIC in 1981-2020.

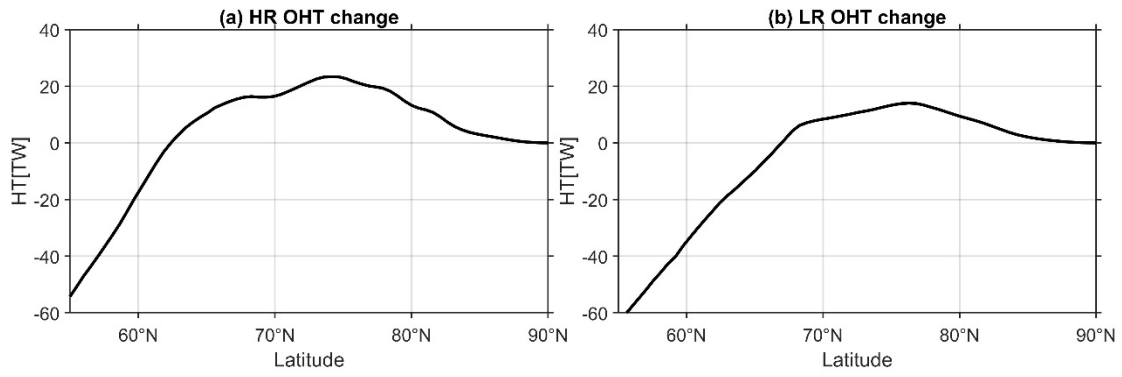

**Fig. S2. Anomalous ocean heat transport in CESM-HR (a) and CESM-LR (b).** “Anomalous” denotes the second-half mean minus the first-half mean of the periods.

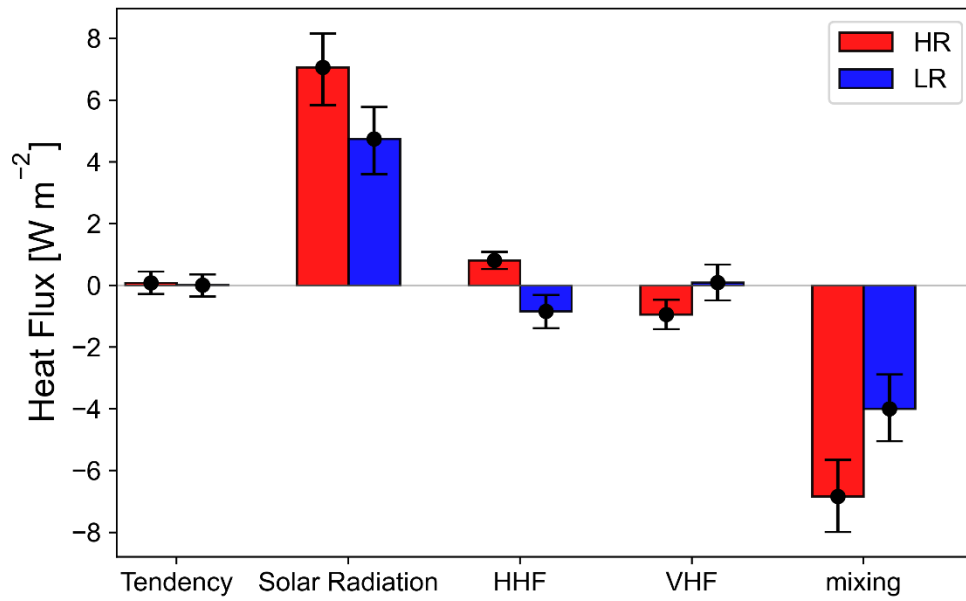

**Fig. S3. Anomalous annual area-mean ocean heat budget in CESM-HR and CESM-LR.** “Anomalous” denotes the second-half mean minus the first-half mean of the periods. The area averaging is performed for the north of 70°N (upper 50m), where most Arctic sea ice is located. HHF and VHF denote horizontal heat flux and vertical heat flux, respectively. The error bars represent 95% confidence intervals.

### Anomalous downwelling solar radiation at atmosphere surface

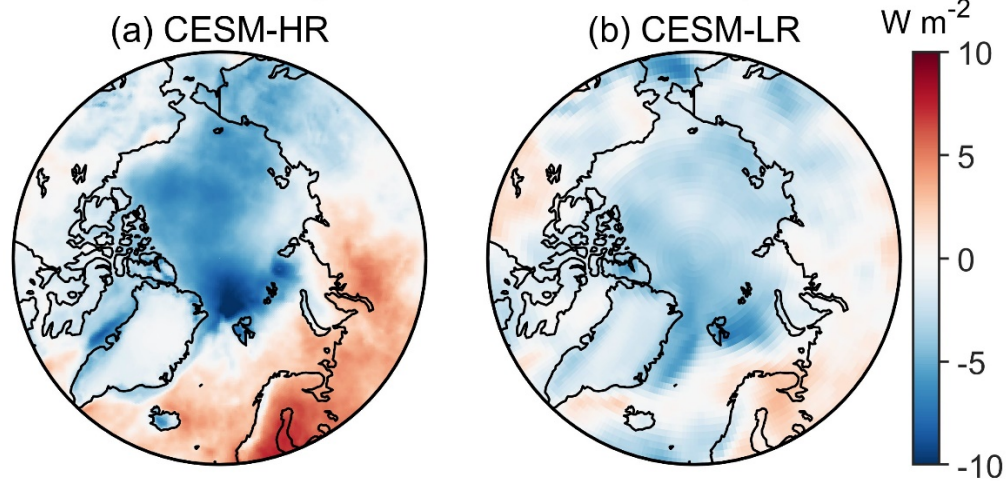

### Anomalous solar radiation through sea ice

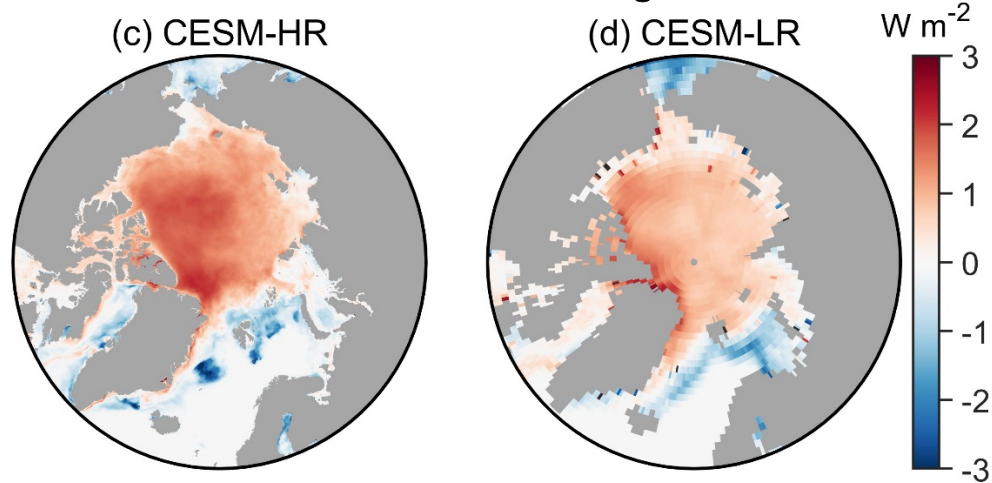

**Fig. S4. Anomalous solar radiation at atmosphere surface and through sea ice in CESM-HR and CESM-LR.** “Anomalous” denotes the second-half mean minus the first-half mean of the periods. a-b, spatial distributions of the anomalous downwelling solar radiation at atmosphere surface in CESM-HR (a) and CESM-LR (b). c-d, spatial distributions of the anomalous solar radiation through sea ice in CESM-HR (c) and CESM-LR (d).

**Spatial decorrelation scale of daily SST anomaly during MHW**

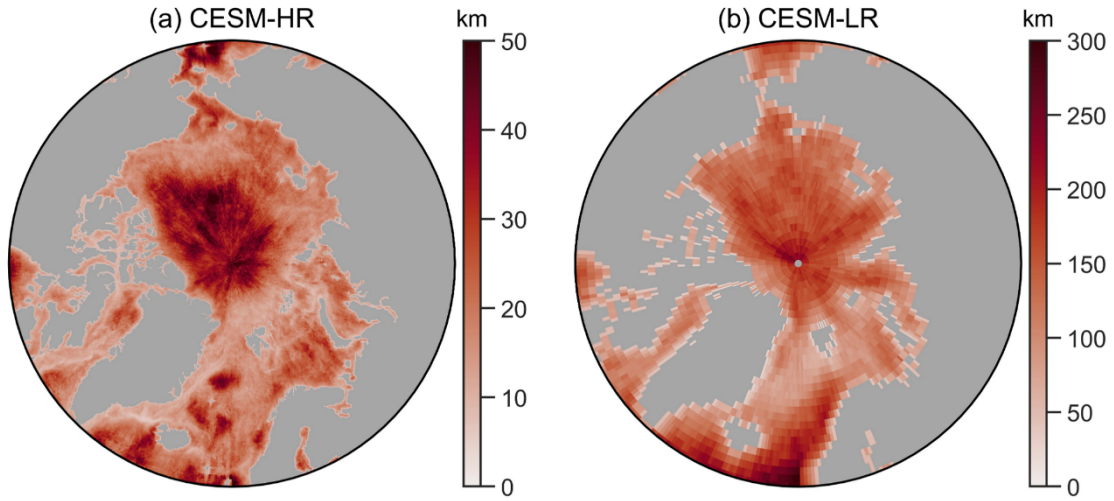

**Annual-mean MHW duration**

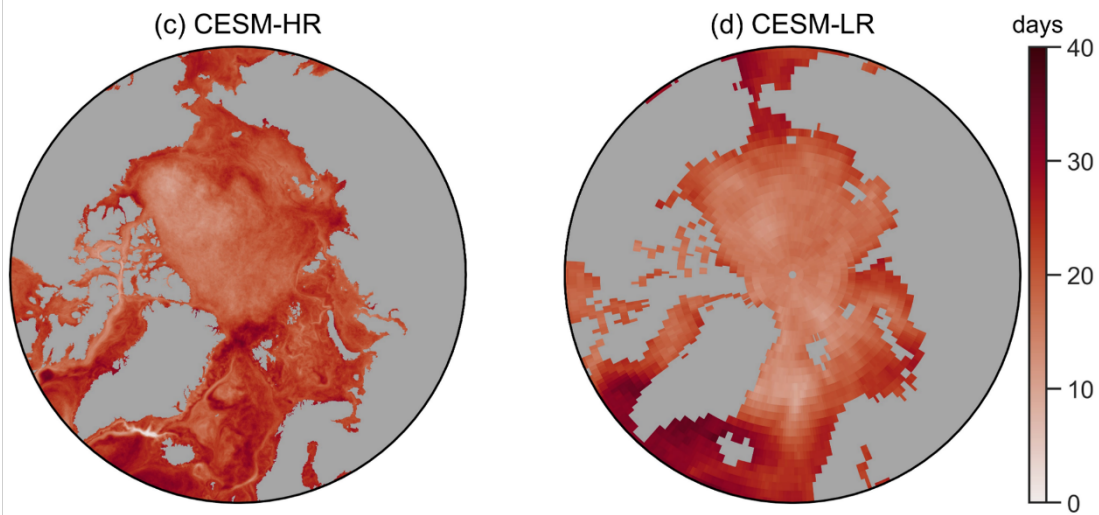

**Fig. S5. Spatial scales and duration of marine heatwaves in CESM-HR and CESM-LR.** a-b, time-mean spatial decorrelation scale of daily SST anomaly during MHW in CESM-HR (a) and CESM-LR (b). c-d, annual-mean MHW duration in CESM-HR (c) and CESM-LR (d).

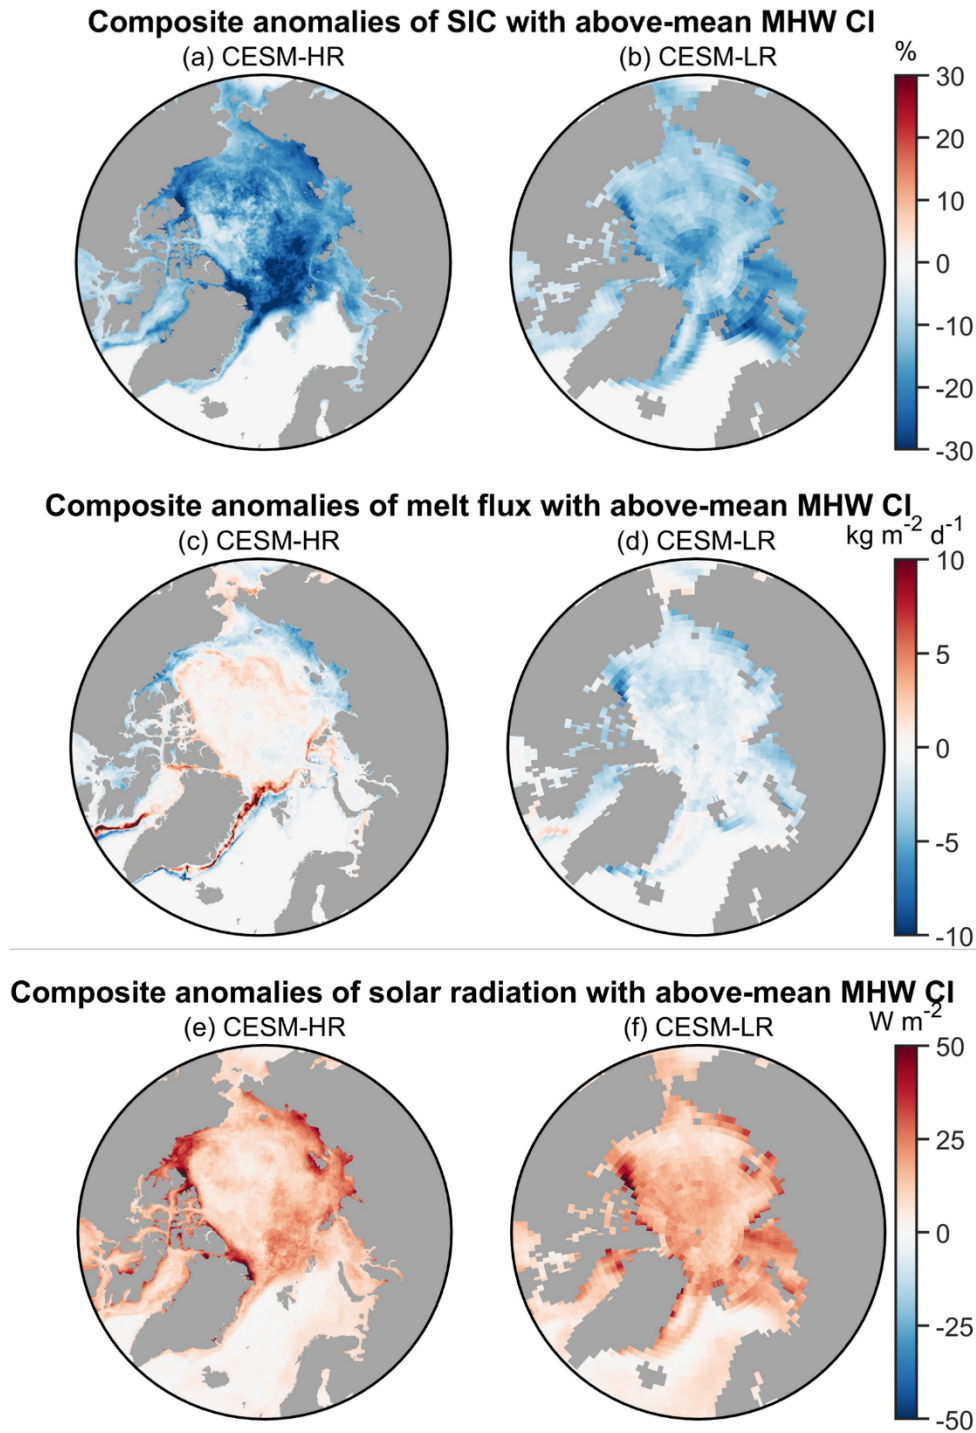

**Fig. S6. Composite monthly anomalies with the cumulative intensity of marine heatwaves above average in CESM-HR and CESM-LR.** a-b, the monthly composite anomalies of SIC in CESM-HR (a) and CESM-LR (b). c-d, the same as (a-b) but for melt flux. e-f, the same as (a-b) but for incoming solar radiation. Long-term trends and seasonal cycles are removed for SIC, melt flux and incoming solar radiation. The anomaly is relative to the period mean.

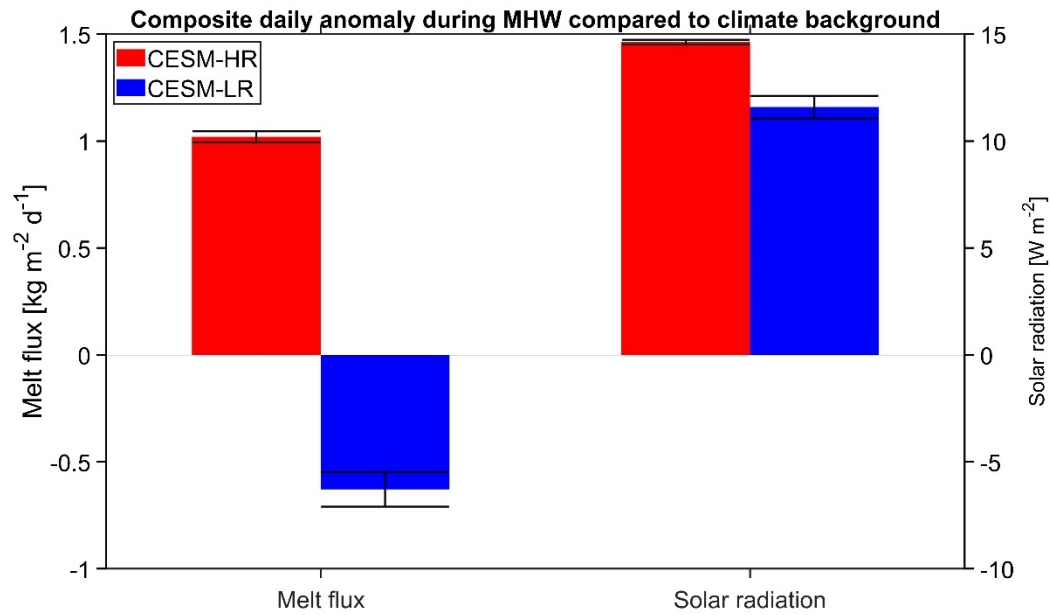

**Fig. S7. Composite daily anomaly of melt flux and incoming solar radiation during marine heatwaves.** The composite applies to all Arctic MHW days where some sea ice coverage is present. The anomaly is relative to the means of 31-year moving baseline periods. The error bars represent 95% confidence intervals.



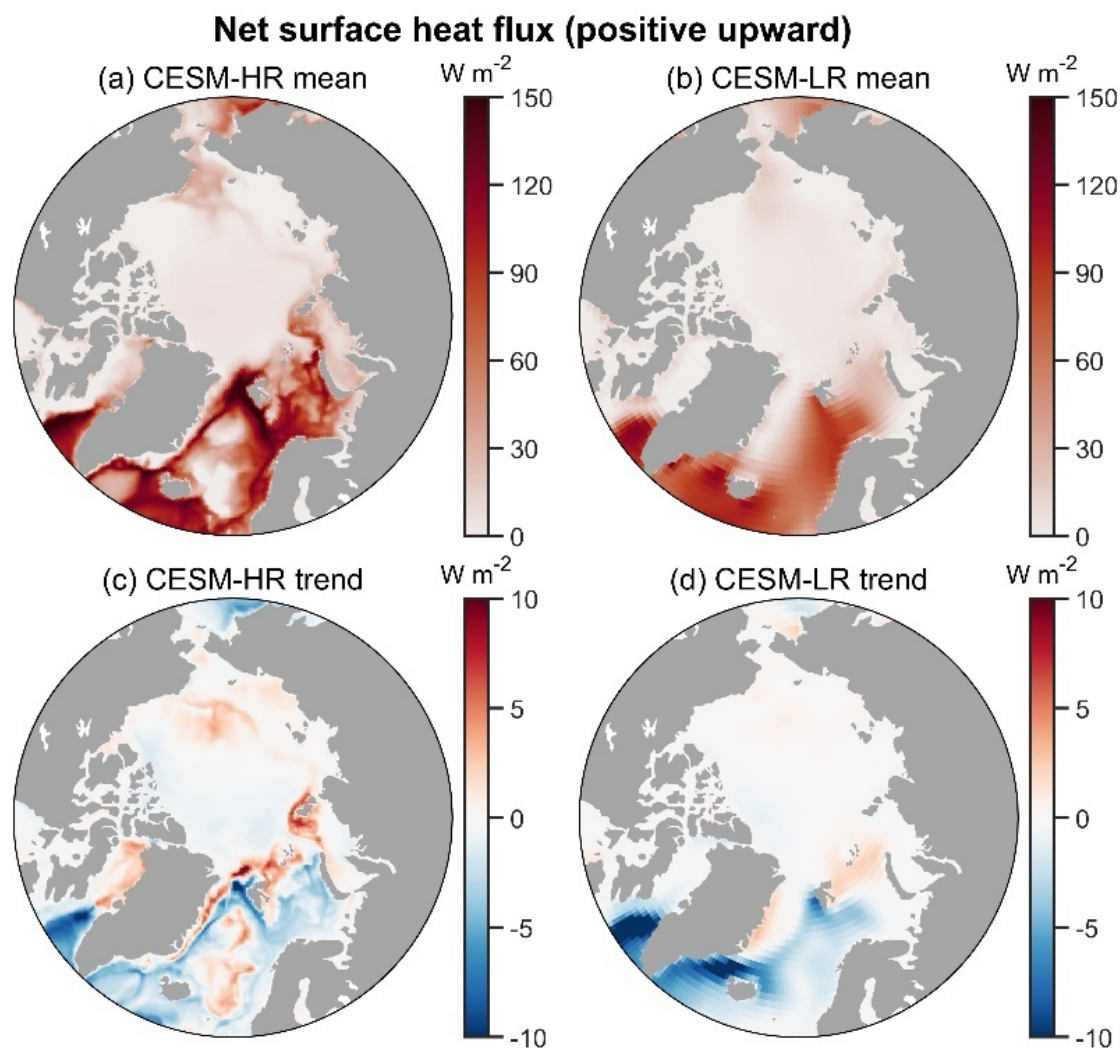

**Fig. S8. Net surface heat flux in CESM-HR and CESM-LR.** a-b, annual mean of surface heat flux in CESM-HR (a) and CESM-LR (b). c-d, linear decadal trend of surface heat flux in CESM-HR (c) and CESM-LR (d). Area-mean values of upward surface heat flux and its positive trend are  $22.6 \text{ W m}^{-2}$ ,  $0.59 \text{ W m}^{-2} \text{ decade}^{-1}$  in CESM-HR and  $15.9 \text{ W m}^{-2}$ ,  $0.46 \text{ W m}^{-2} \text{ decade}^{-1}$  in CESM-LR. The trends at where the magnitude is above  $2 \text{ W m}^{-2} \text{ decade}^{-1}$  are statistically significant at 95% confidence level.

| High-resolution model versions from HighResMIP | Low-resolution model versions from HighResMIP |
|------------------------------------------------|-----------------------------------------------|
| CESM1-CAM5-SE-HR (ocn-ice: 25km, atm: 25km)    | CESM1-CAM5-SE-LR (ocn-ice: 100km, atm: 100km) |
| FGOALS-f3-H (ocn-ice: 10km, atm: 25km)         | FGOALS-f3-L (ocn-ice: 100km, atm: 100km)      |
| CMCC-CM2-VHR4 (ocn-ice: 25km, atm: 50km)       | CMCC-CM2-SR5 (ocn-ice: 100km, atm: 100km)     |
| CNRM-CM6-1-HR (ocn-ice: 25km, atm: 50km)       | CNRM-CM6-1 (ocn-ice: 100km, atm: 250km)       |
| EC-Earth3P-HR (ocn-ice: 25km, atm: 25km)       | EC-Earth3P (ocn-ice: 100km, atm: 100km)       |
| HadGEM3-GC31-HH (ocn-ice: 10km, atm: 50km)     | HadGEM3-GC31-LL (ocn-ice: 100km, atm: 250km)  |

**Table S1.** HighResMIP models. The brackets indicate the nominal horizontal resolutions of the ocean (abbreviated as ocn), ice, atmosphere (abbreviated as atm) modules of the models.
